# Supplementary material for: Resolution of Genetic Map Expansion Caused by Excess Heterozygosity in Plant Recombinant Inbred Populations
Source: PubMed Central journal article supplement (PMC4199702; doi:10.1534/g3.114.012468), 2014-08-15
Supplement: supp_g3.114.012468_FigureS1.pdf [file supp_g3.114.012468_FigureS1.pdf]

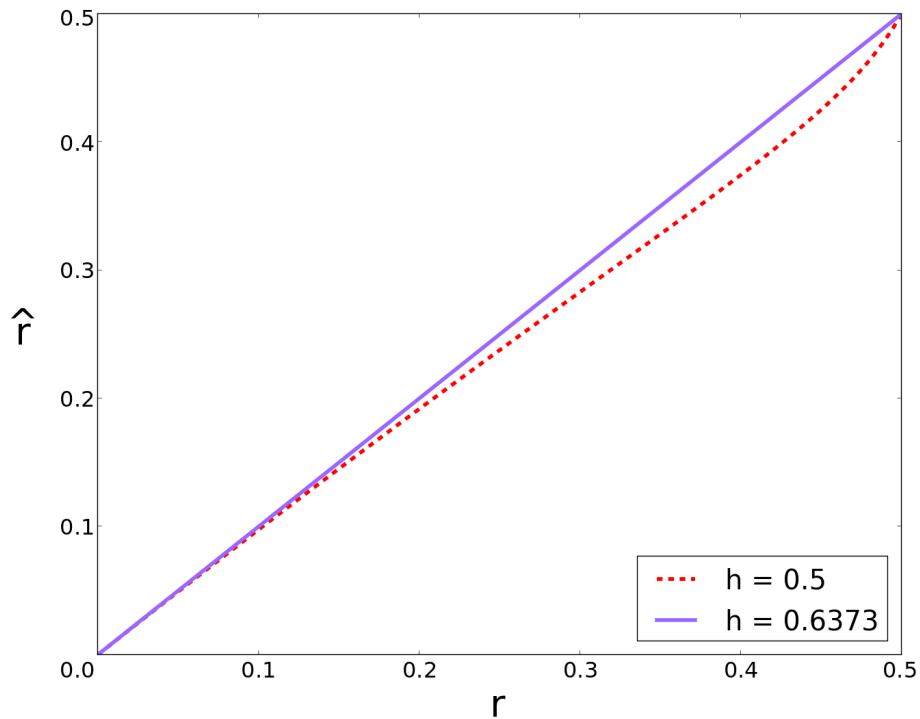

Figure S1: **Estimated recombination fractions,  $\hat{r}$ , of excess heterozygosity versus Mendelian expectations for  $t = 3$ .** Recombination fractions estimated from genotype frequencies under Mendelian expectations ( $h=0.5$ ) versus under modeling a global heterozygosity advantage ( $h=0.6373$ ) at generation  $t = 3$  of a selfing population. This shows that if the population was retaining excess heterozygosity (at a rate of 63.73% each generation as opposed to the Mendelian 50%), then estimating recombination fractions under Mendelian expectations would shrink the map if observed at generation  $t = 3$ .
